# Supplementary material for: Efficient room-temperature hydrogenation of nitroaromatic compounds to primary amines using nitrogen-doped carbon-supported palladium catalysts
Source: Royal Society of Chemistry journal article supplement (doi:10.1039/d3nj05050e), 2024-01-01

## Supporting Information

### **Efficient Room-Temperature Hydrogenation of Nitroaromatic Compounds to Primary Amines Using Nitrogen-Doped Carbon-Supported Palladium Catalysts**

Yuandie Ma<sup>a</sup>, Huanyu Zhao<sup>a</sup>, Shiyong Zhang<sup>a</sup>, Jie He<sup>a,\*</sup>, and Zehui Zhang<sup>a</sup>

*<sup>a</sup>Key Laboratory of Catalysis and Energy Materials Chemistry of Ministry of Education & Hubei Key Laboratory of Catalysis and Materials Science, South-Central Minzu University, Wuhan 430074, P. R. China*

*Email address: [jiehe@scuec.edu.cn](mailto:jiehe@scuec.edu.cn)*

### Table of Contents

|                                    |   |
|------------------------------------|---|
| 1. Characterization results .....  | 1 |
| 2. Control experiments.....        | 4 |
| 3. Amplification experiments ..... | 4 |
| 4. Copy of GC-MS for products..... | 5 |

## 1. Characterization results

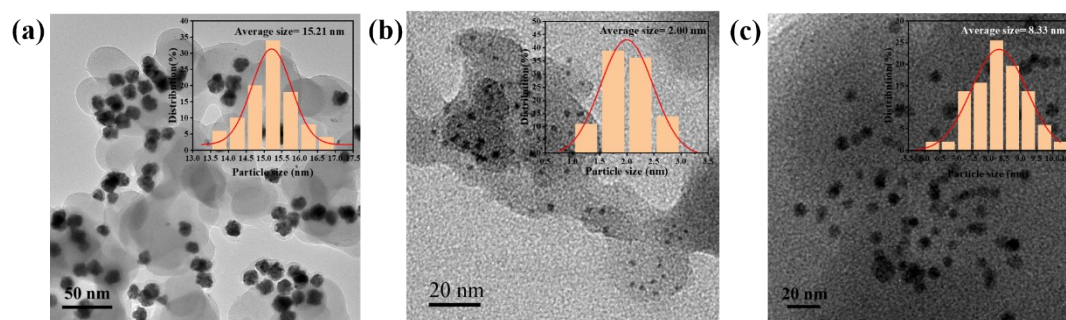

**Figure S1.** (a) TEM image of Pd<sub>2.0</sub>/C-300, (b) TEM image of Pd<sub>2.0</sub>/CN-250, and (c) TEM image of Pd<sub>2.0</sub>/CN-350.

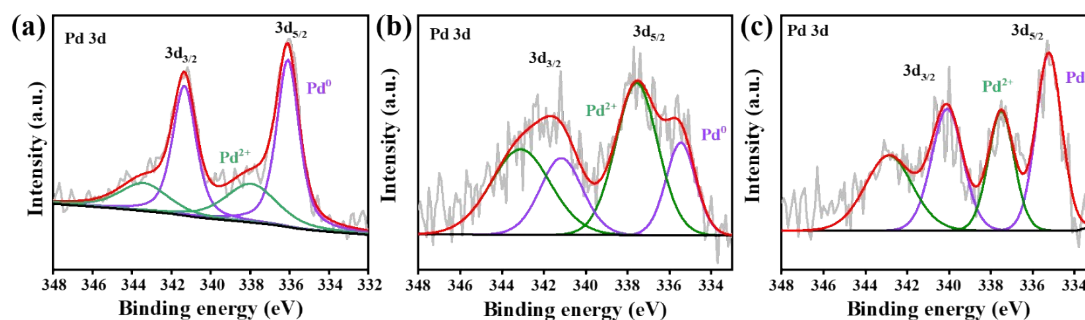

**Fig. S2** XPS Pd 3d spectra of the prepared catalysts. (a) Pd<sub>2.0</sub>/C-300; (b) Pd<sub>2.0</sub>/CN-250; and (c) Pd<sub>2.0</sub>/CN-350.

**Table S1.** The percentage of the palladium species in different catalysts calculated from the XPS Pd 3d spectra.

| Catalyst                  | Pd (0) (%) | Pd (II) (%) |
|---------------------------|------------|-------------|
| Pd <sub>2.0</sub> /C-300  | 60.4       | 39.6        |
| Pd <sub>2.0</sub> /CN-250 | 33.2       | 66.8        |
| Pd <sub>2.0</sub> /CN-300 | 54.3       | 45.7        |
| Pd <sub>2.0</sub> /CN-350 | 56.1       | 43.9        |

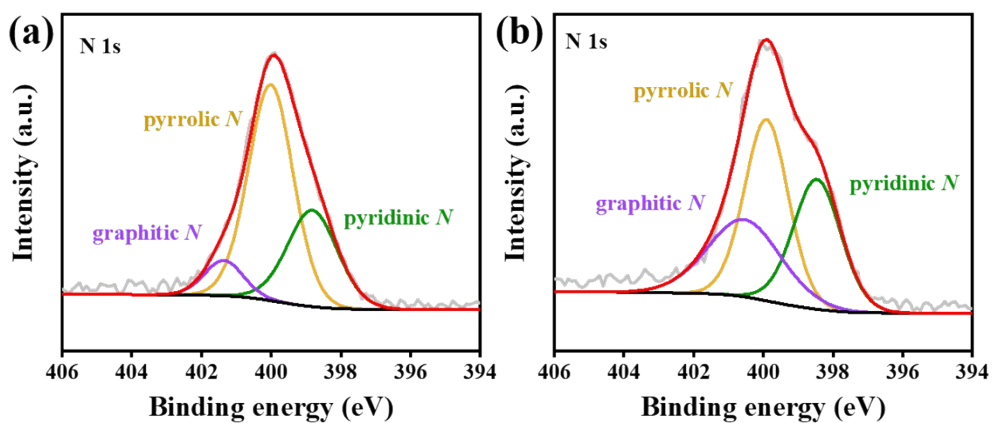

**Fig. S3** XPS N 1s spectra of the prepared catalysts. (a) Pd<sub>2.0</sub>/CN-250; (b) Pd<sub>2.0</sub>/CN-350.

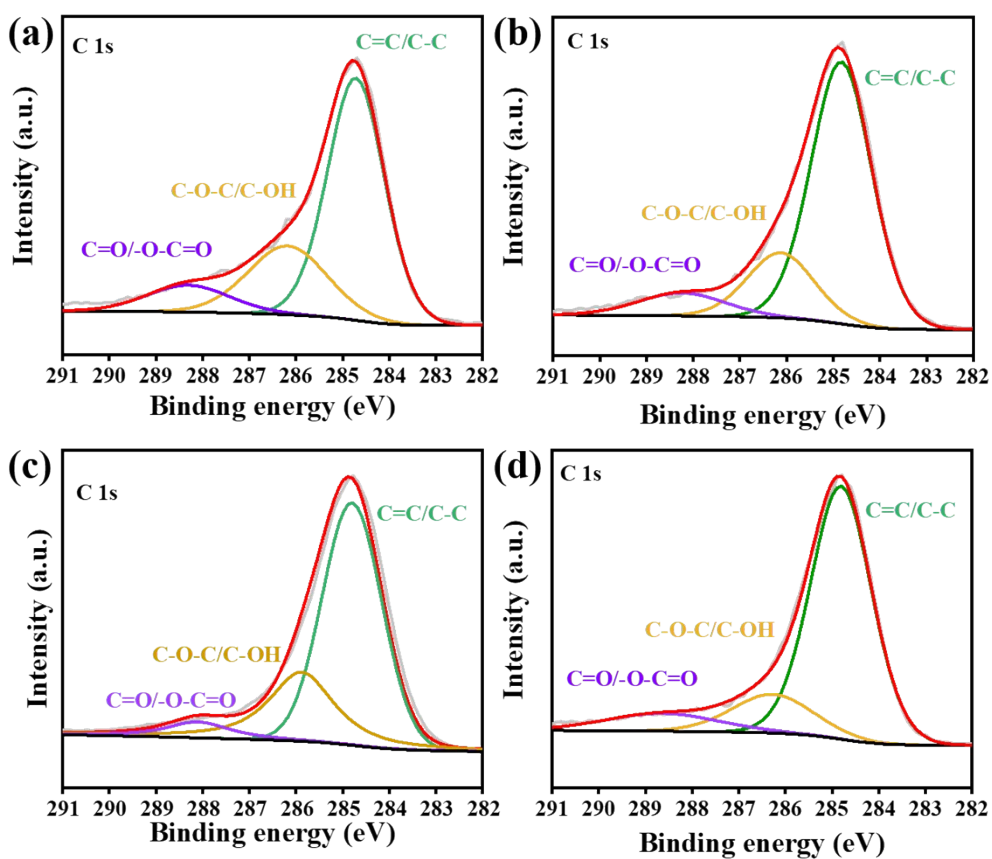

**Fig. S4** XPS C 1s spectra of the as-prepared catalysts. (a) Pd<sub>2.0</sub>/C-300; (b) Pd<sub>2.0</sub>/CN-250; and (c) Pd<sub>2.0</sub>/CN-300; (d) Pd<sub>2.0</sub>/CN-350.

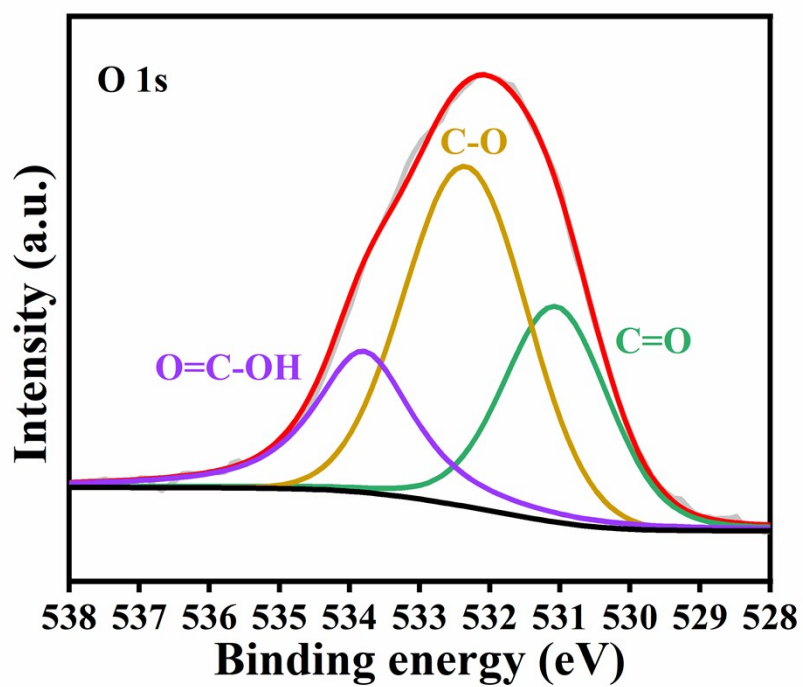

**Fig. S5** The XPS O 1s spectrum of Pd<sub>2.0</sub>/CN-300.

**Table S2.** Content of Pd element in Pd<sub>2.0</sub>/CN-300 before and after cyclic reaction measured by ICP-OES.

| Entry | Catalysts                       | Pd (%) |
|-------|---------------------------------|--------|
| 1     | Fresh Pd <sub>2.0</sub> /CN-300 | 2.1    |
| 2     | Used Pd <sub>2.0</sub> /CN-300  | 2.0    |

## 2. Control experiments

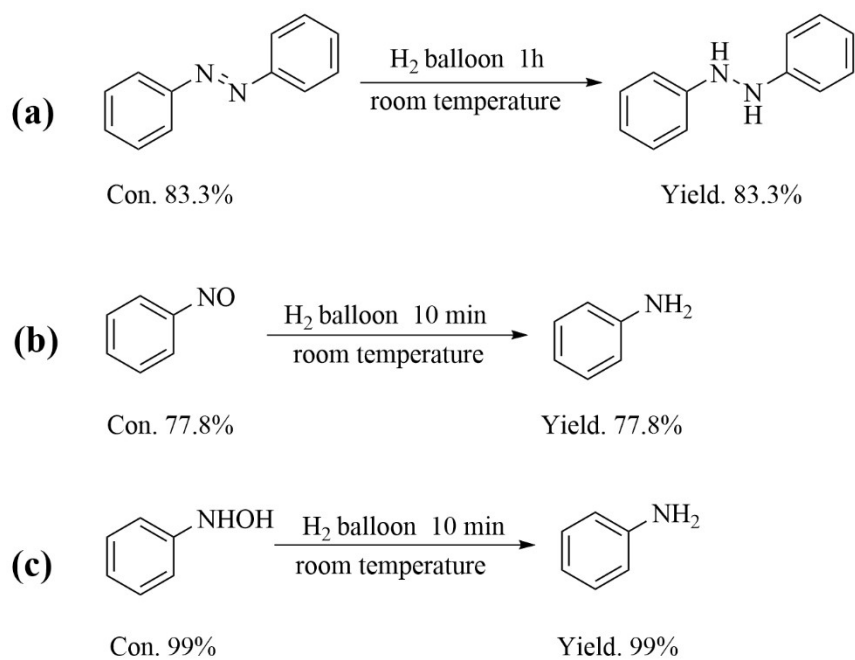

**Scheme S1** Control experiments. Reaction conditions: substrate (0.5 mmol), catalyst (20 mg), ethanol (10 mL).

## 3. Amplification experiments

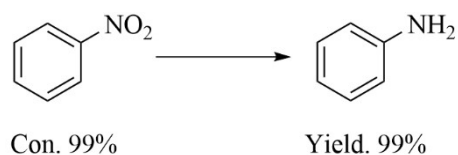

**Scheme S2** Amplification experiments. Reaction conditions: nitrobenzene (5 mmol), catalyst (20 mg), H<sub>2</sub> balloon, ethanol (10 mL), room temperature, and 10 h.

#### 4. Copy of GC-MS for products

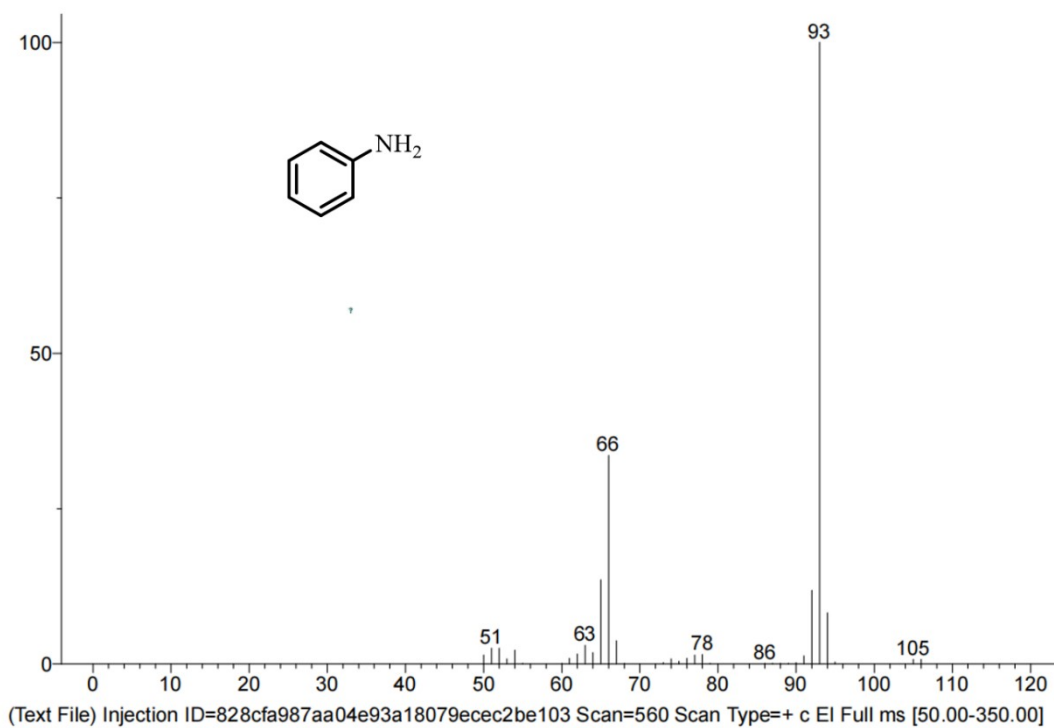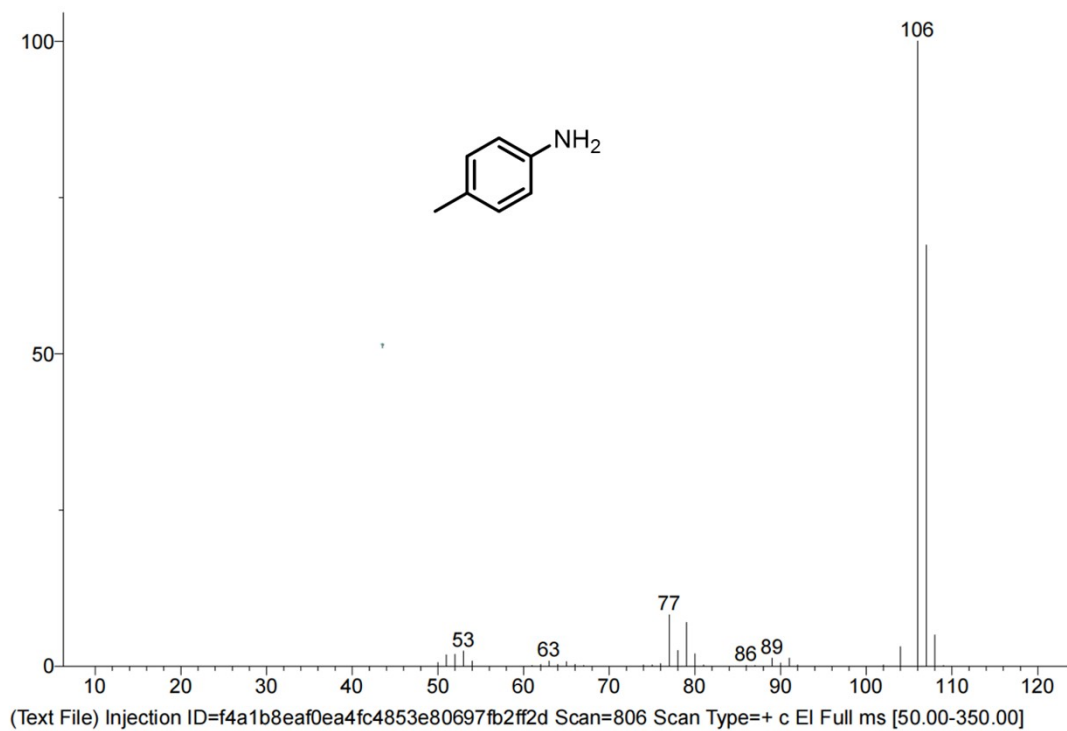

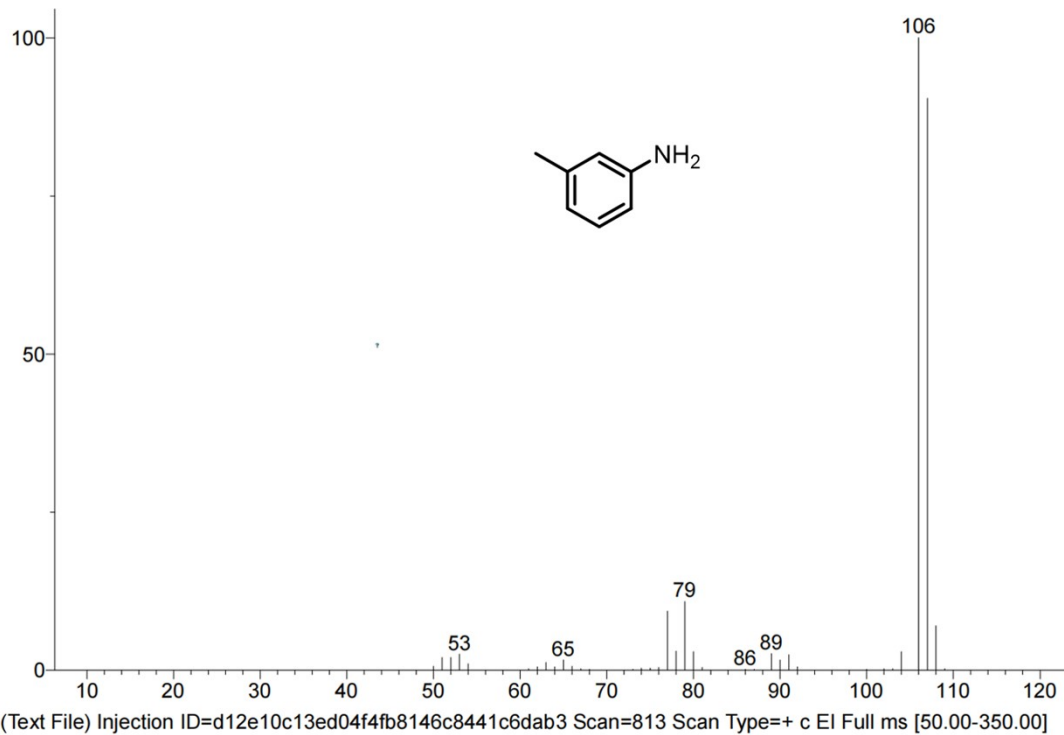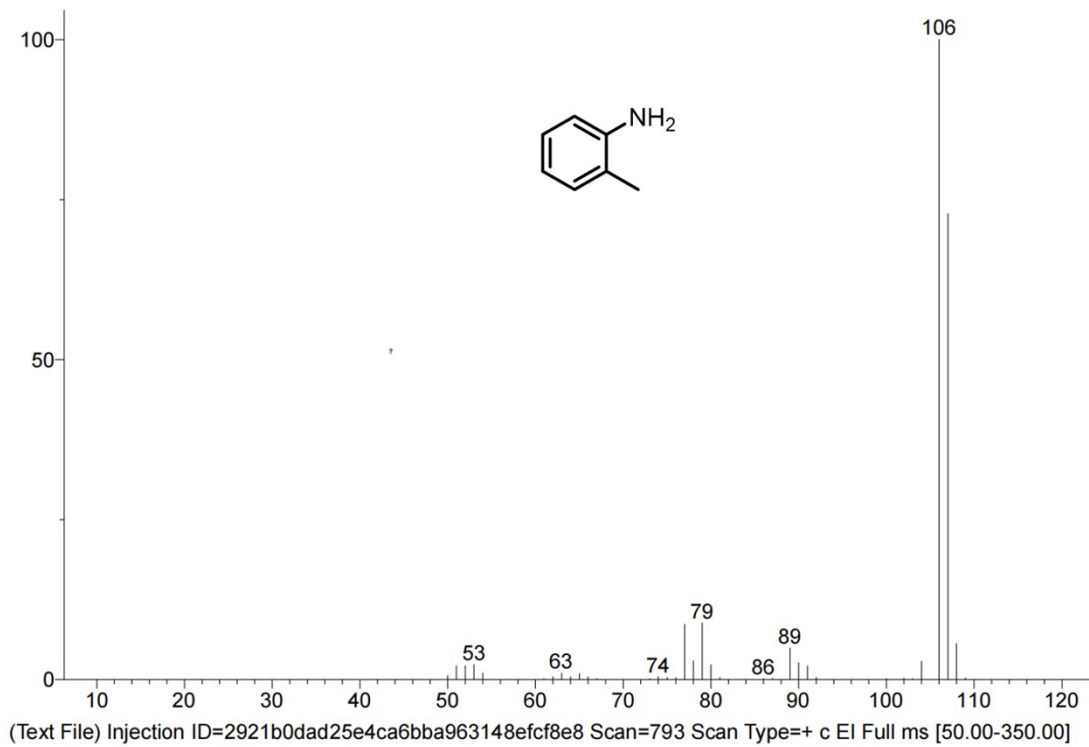

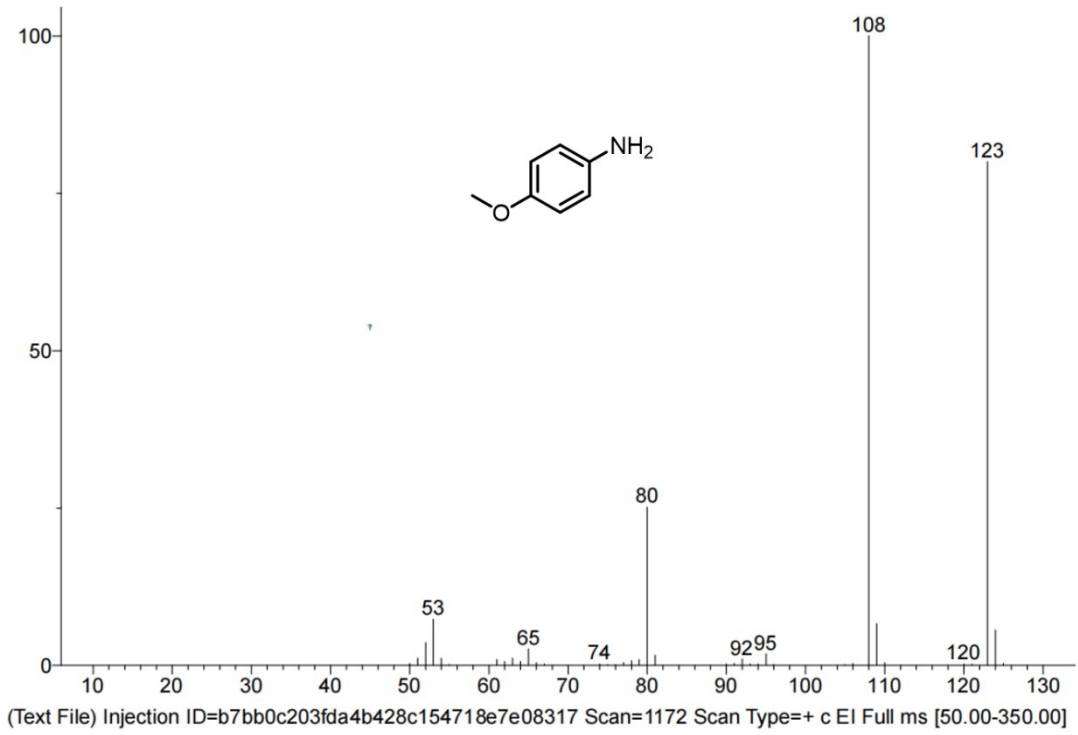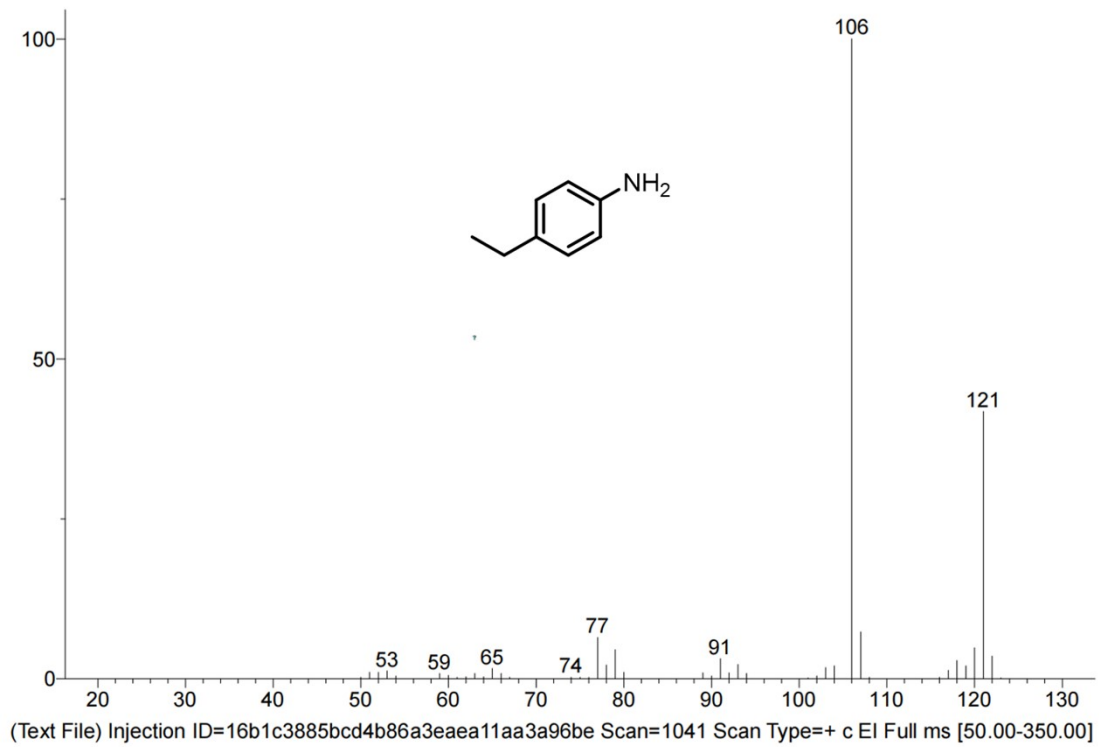



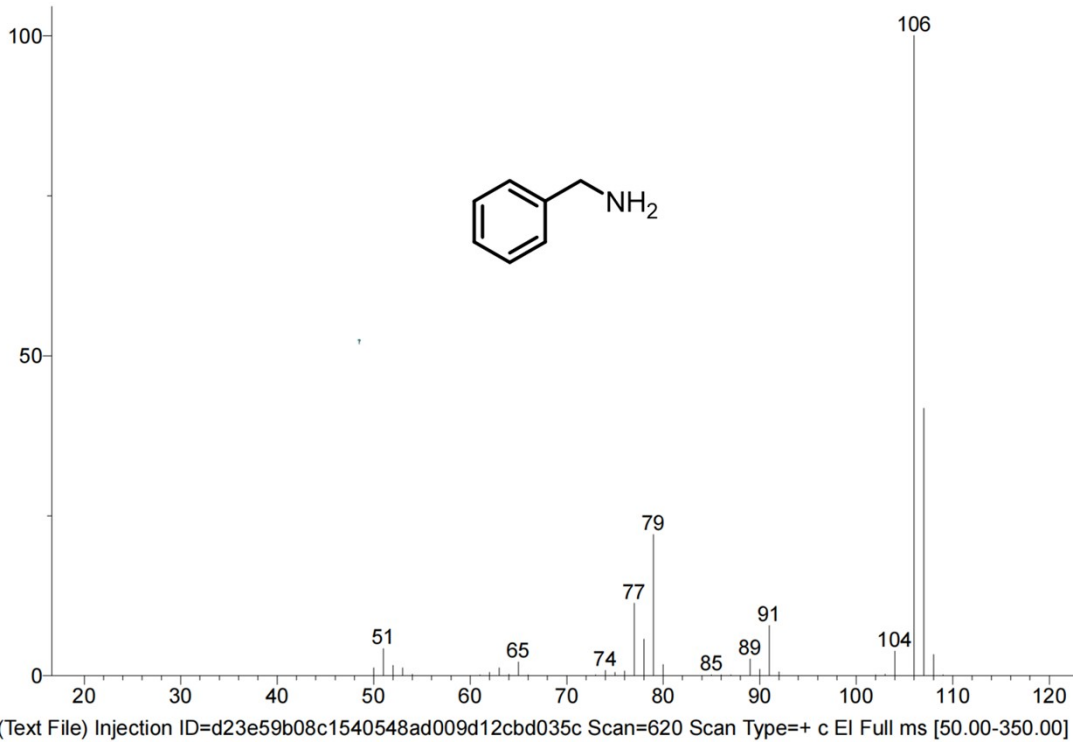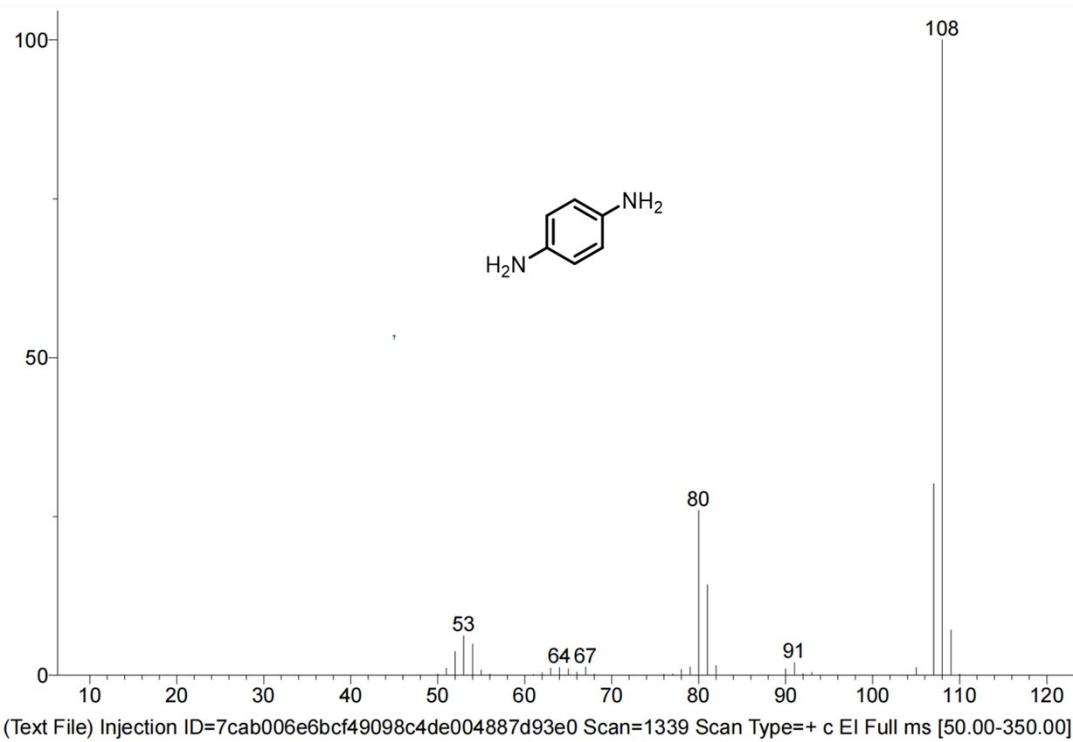

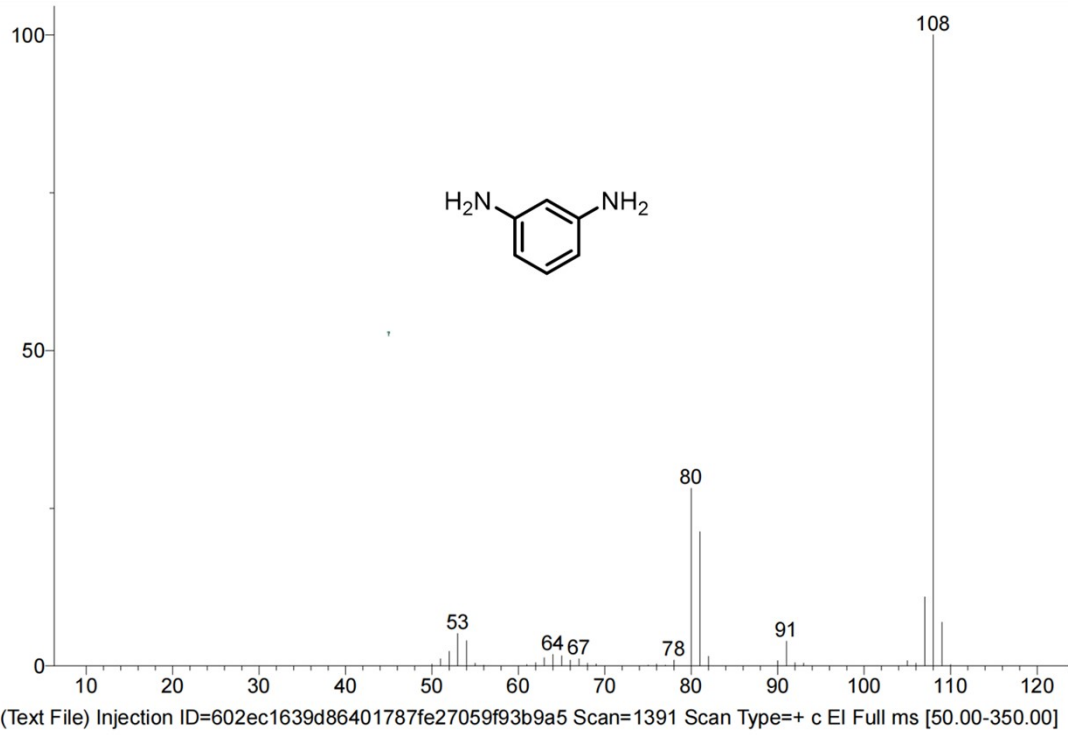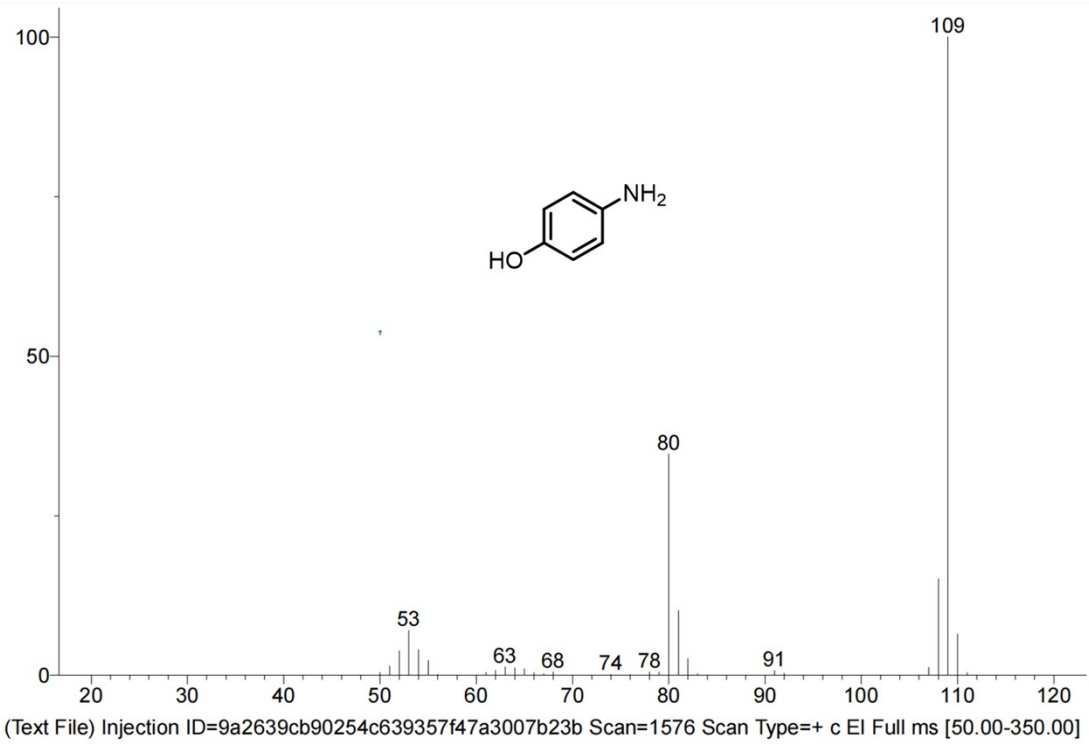

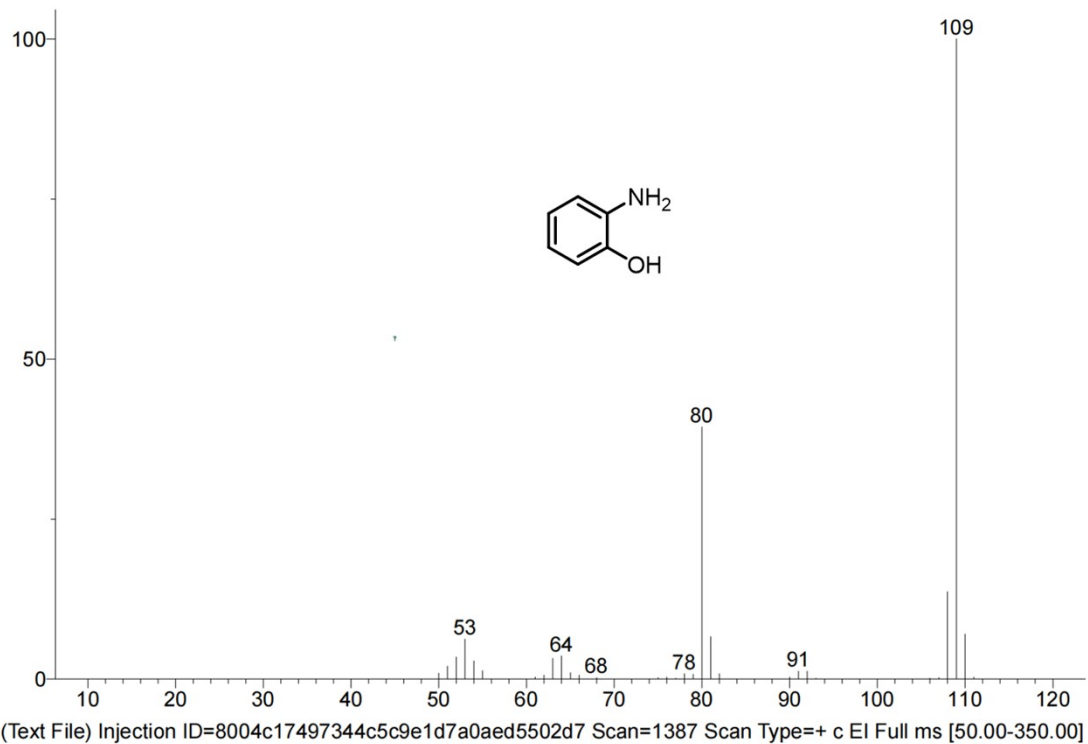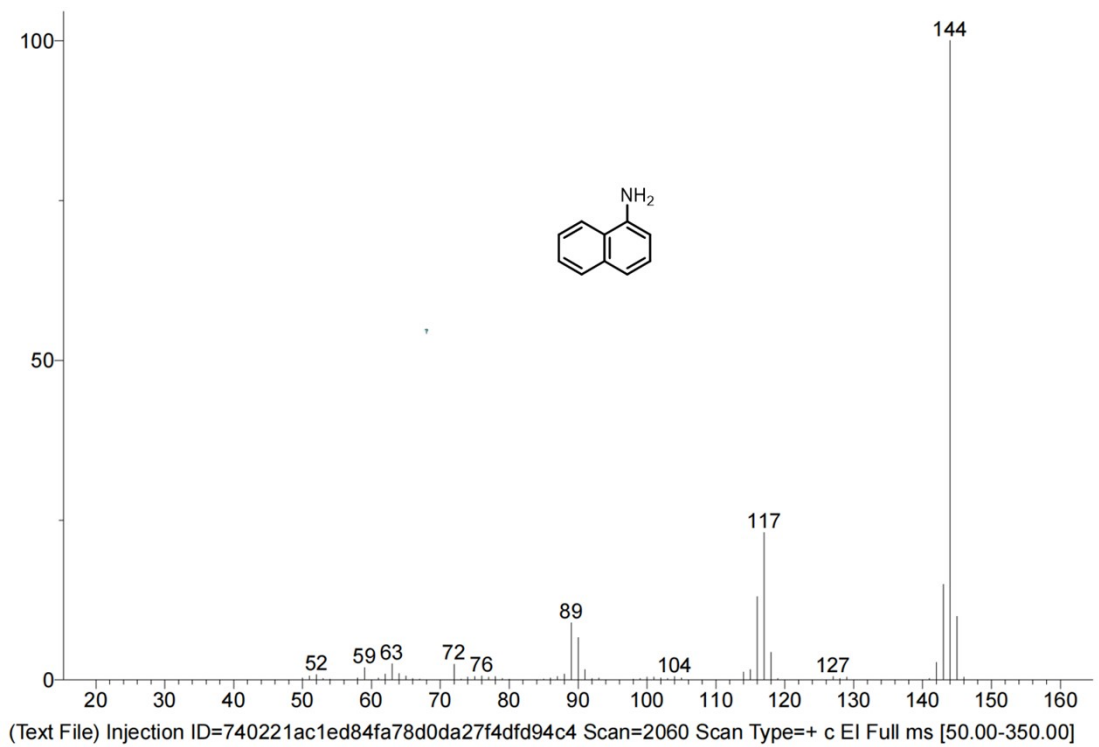

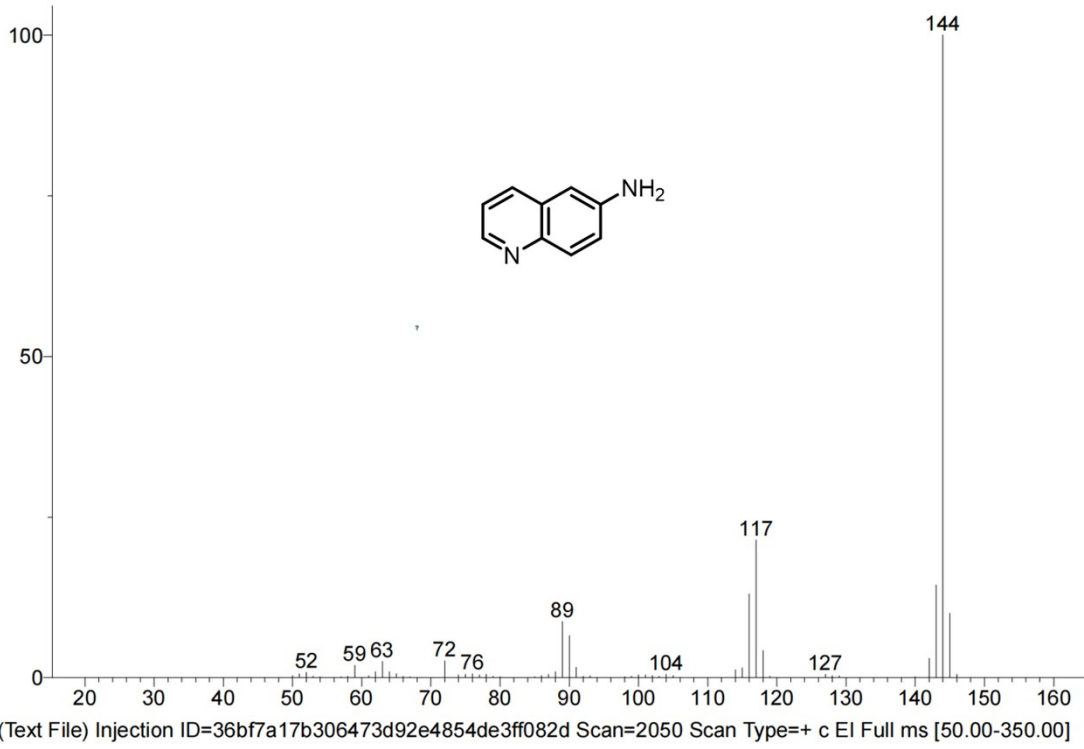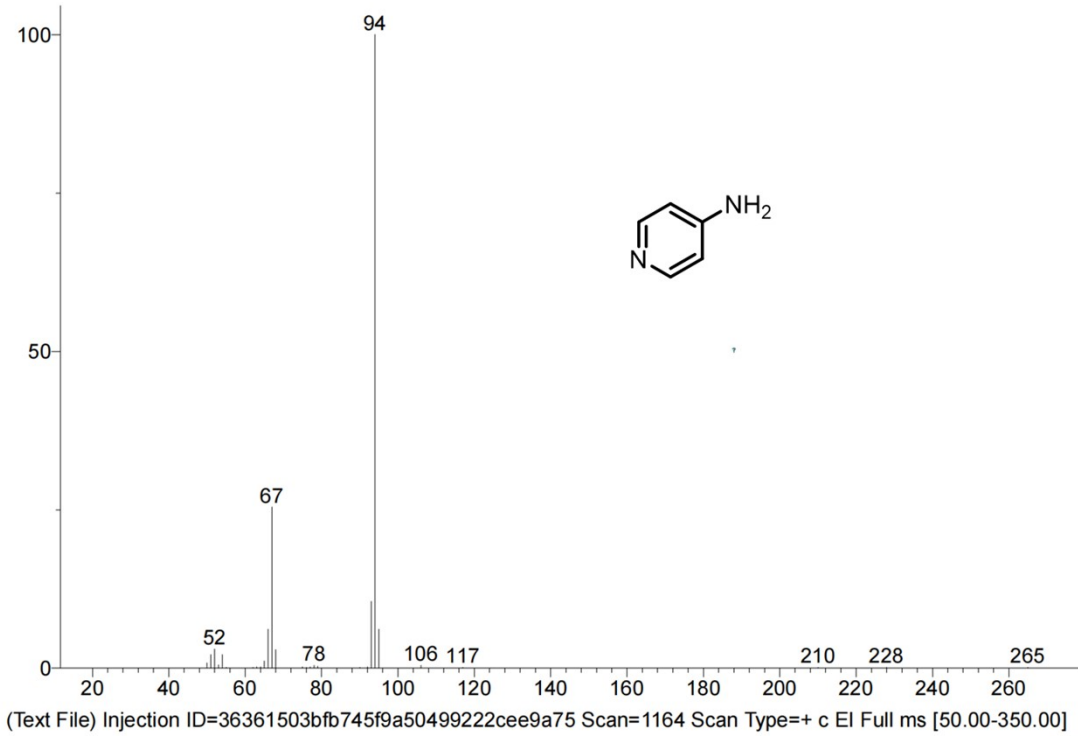

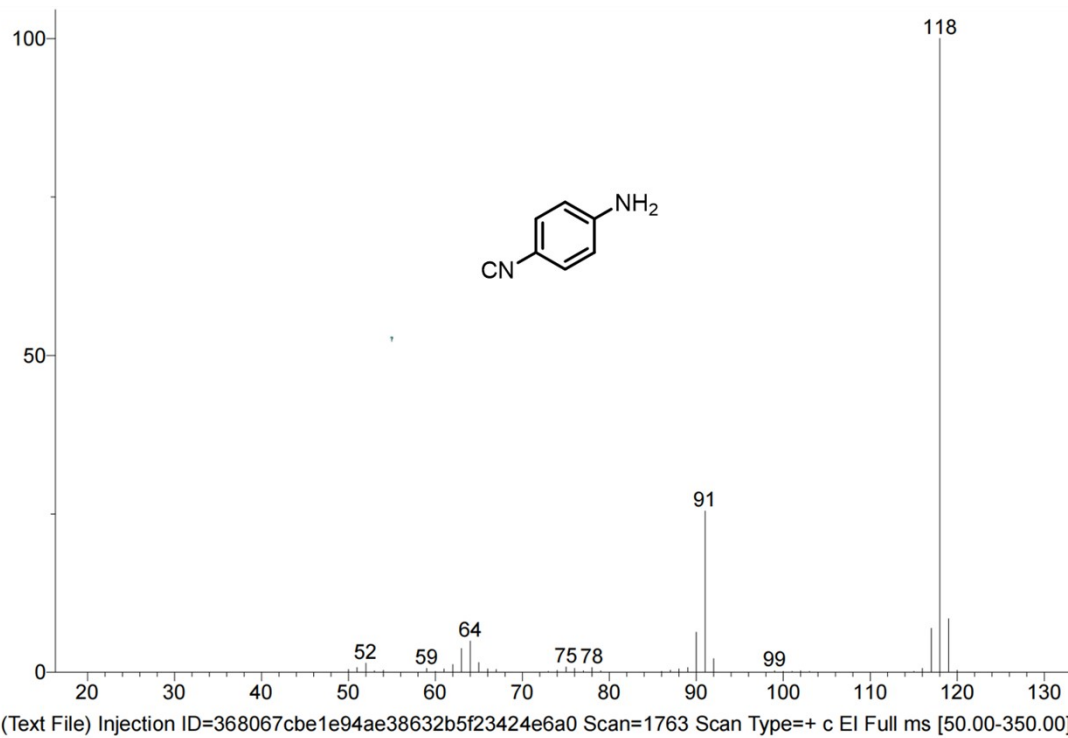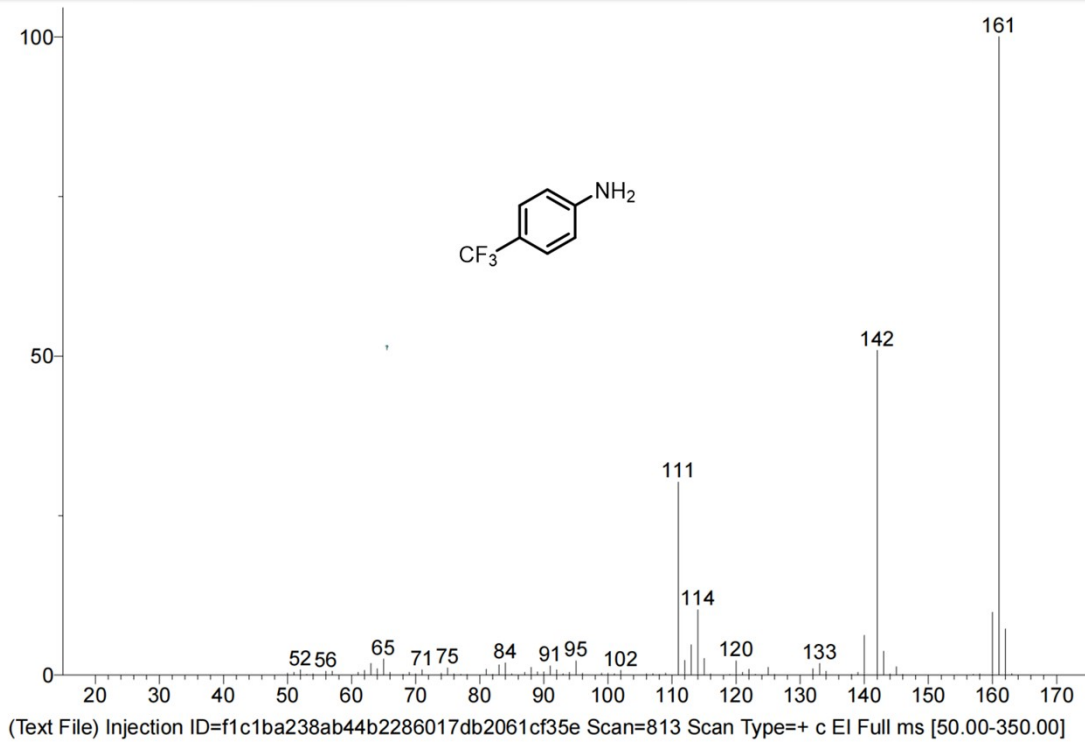

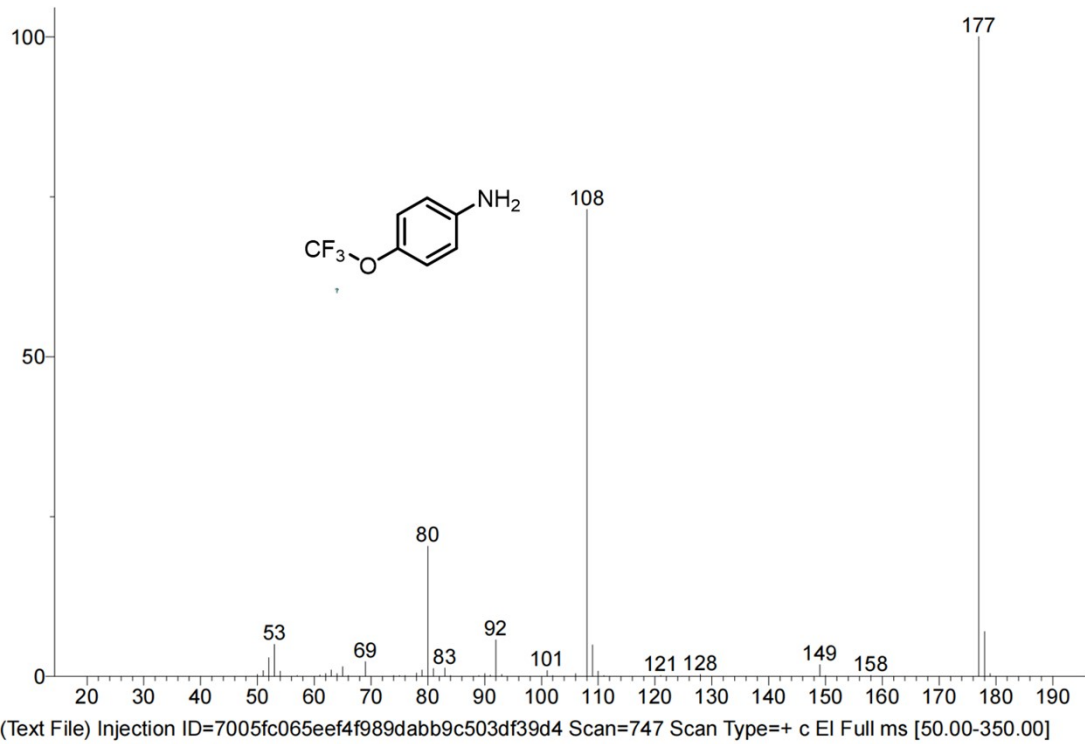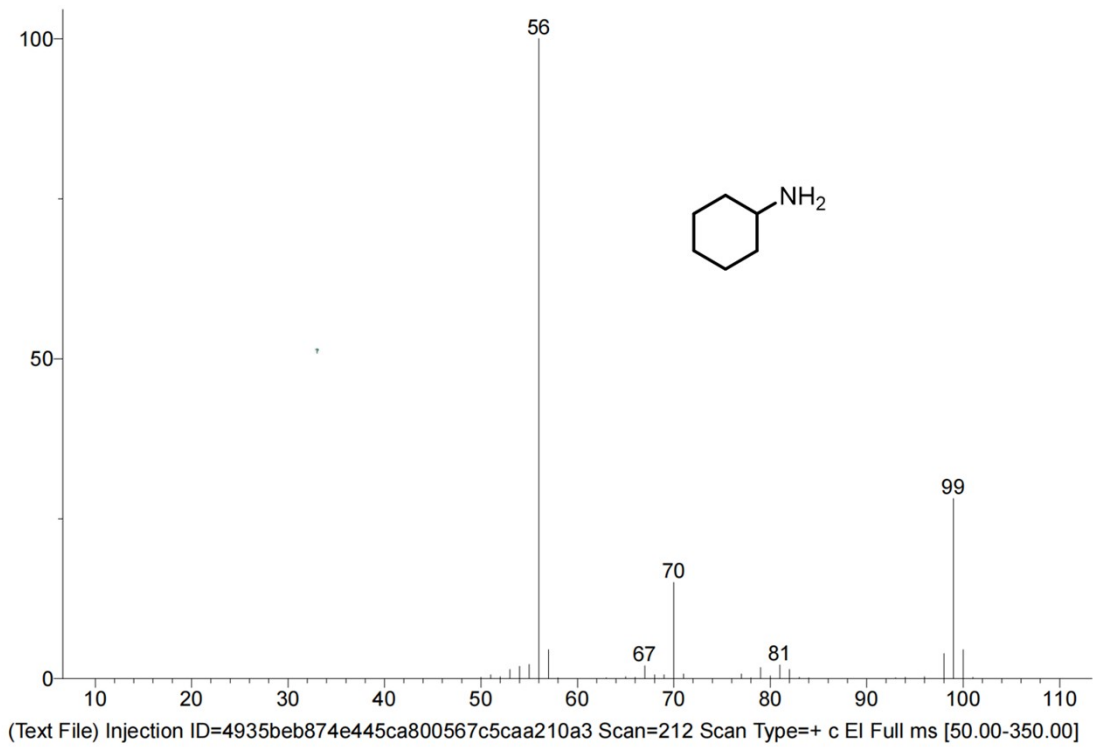

Supplement: d3nj05050e1.pdf [file d3nj05050e1.pdf]
